# Supplementary material for: Metagenomic Analysis of the Fecal Archaeome in Suckling Piglets Following Perinatal Tulathromycin Metaphylaxis
Source: MDPI journal article supplement (doi:10.3390/ani11061825), 2021-06-18

## Supplementary Material

**Figure S1.** Rarefaction curves of sequences reads obtained from fecal samples from piglets in both control (CONT) and tulathromycin (TUL) groups at different sampling days 0, 5, and 20.

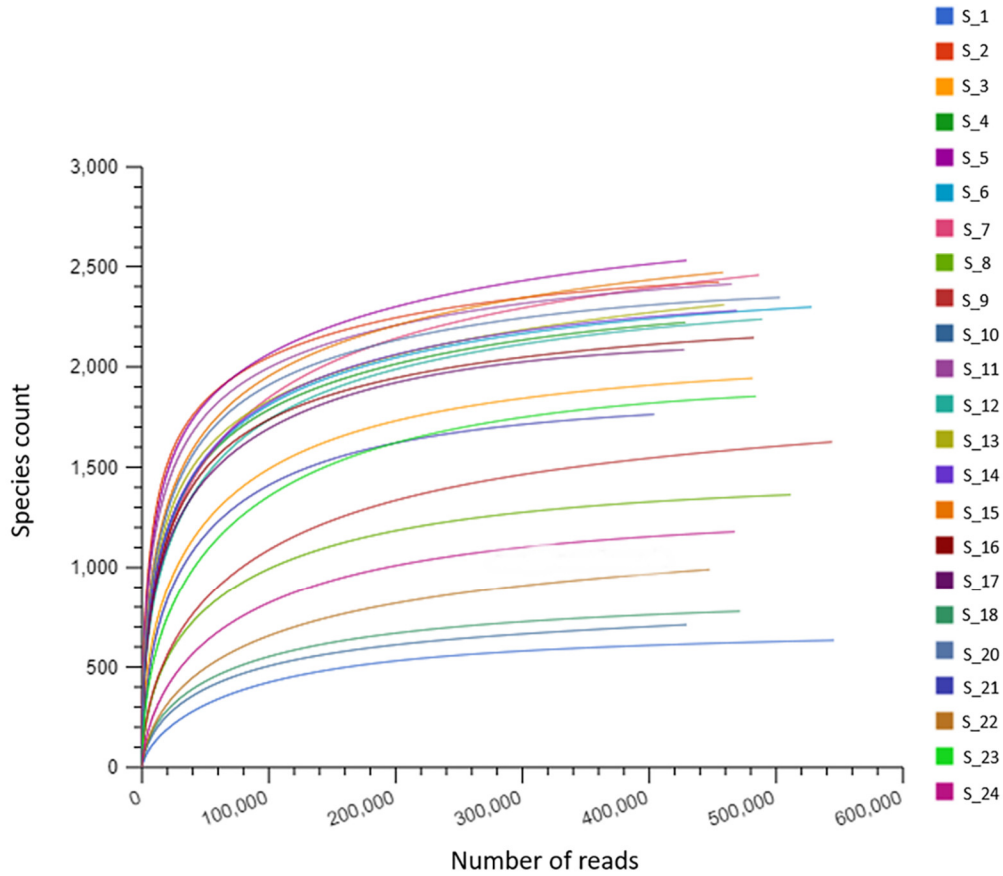

Supplement: s1 [file s1]
